# Supplementary material for: Stereochemistry of N-Acyl-5H-dibenzo[b,d]azepin-7(6H)-ones
Source: MDPI journal article supplement (doi:10.3390/molecules28124734), 2023-06-13

## Supporting Information

### Stereochemistry of *N*-acyl-5*H*-dibenzo[*b,d*]azepin-7(6*H*)-ones

Arisa Chiba <sup>1</sup>, Ryoko Tanaka <sup>1</sup>, Mayuno Hotta <sup>1</sup>, Kayo Nakamura <sup>1</sup>, Kosho Makino <sup>2</sup>, Hidetsugu Tabata <sup>3</sup>, Tetsuta Oshitari <sup>3</sup>, Hideaki Natsugari <sup>4</sup> and Hideyo Takahashi <sup>1,\*</sup>

<sup>1</sup> Faculty of Pharmaceutical Sciences, Tokyo University of Science, 2641 Yamazaki, Noda-shi, Chiba 278-8510, Japan

<sup>2</sup> Research Institute of Pharmaceutical Sciences, Musashino University, 1-1-20 Shinmachi, Nishitokyo-shi, Tokyo 202-8585, Japan

<sup>3</sup> Faculty of Pharma Sciences, Teikyo University, 2-11-1 Kaga, Itabashi-ku, Tokyo 173-8605, Japan

<sup>4</sup> Graduate School of Pharmaceutical Science, The University of Tokyo, 7-3-1 Hongo, Bunkyo-ku, Tokyo 113-0033, Japan

\* Correspondence: hide-tak@rs.tus.ac.jp; Tel.: +81-47-121-4436

## Contents

|                                                        |    |
|--------------------------------------------------------|----|
| 1. <sup>1</sup> H and <sup>13</sup> C NMR Spectra..... | S1 |
|--------------------------------------------------------|----|

# 1. $^1\text{H}$ and $^{13}\text{C}$ NMR Spectra

## $^1\text{H}$ NMR (600 MHz, $\text{CDCl}_3$ , ppm) of **4**

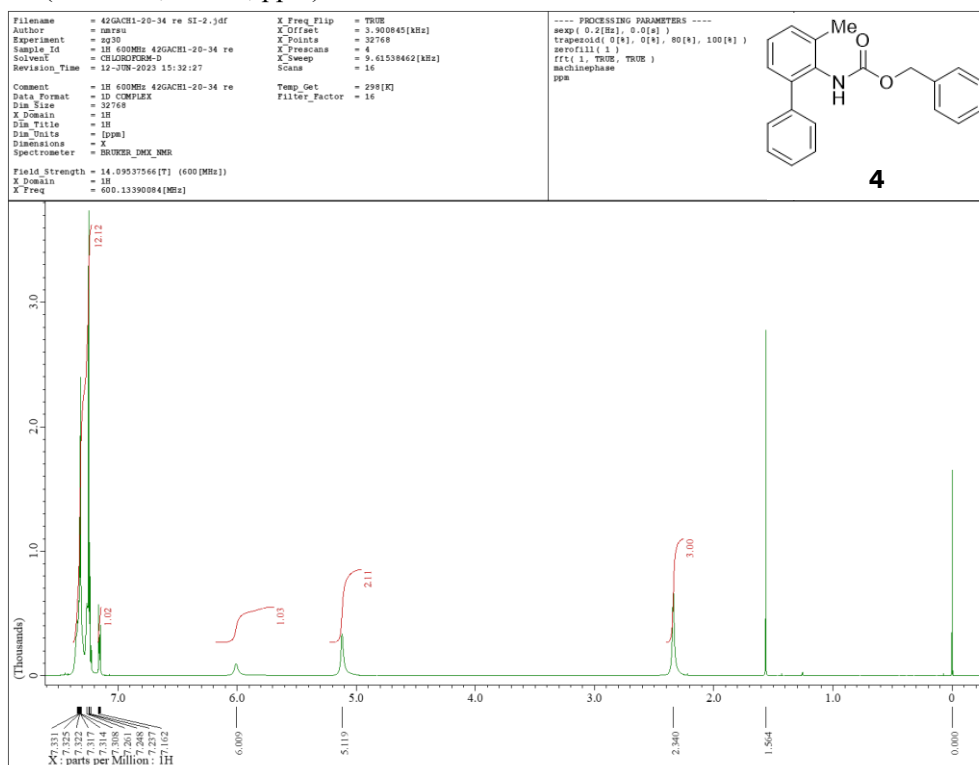

## $^{13}\text{C}$ NMR (150 MHz, $\text{CDCl}_3$ , ppm) of **4**

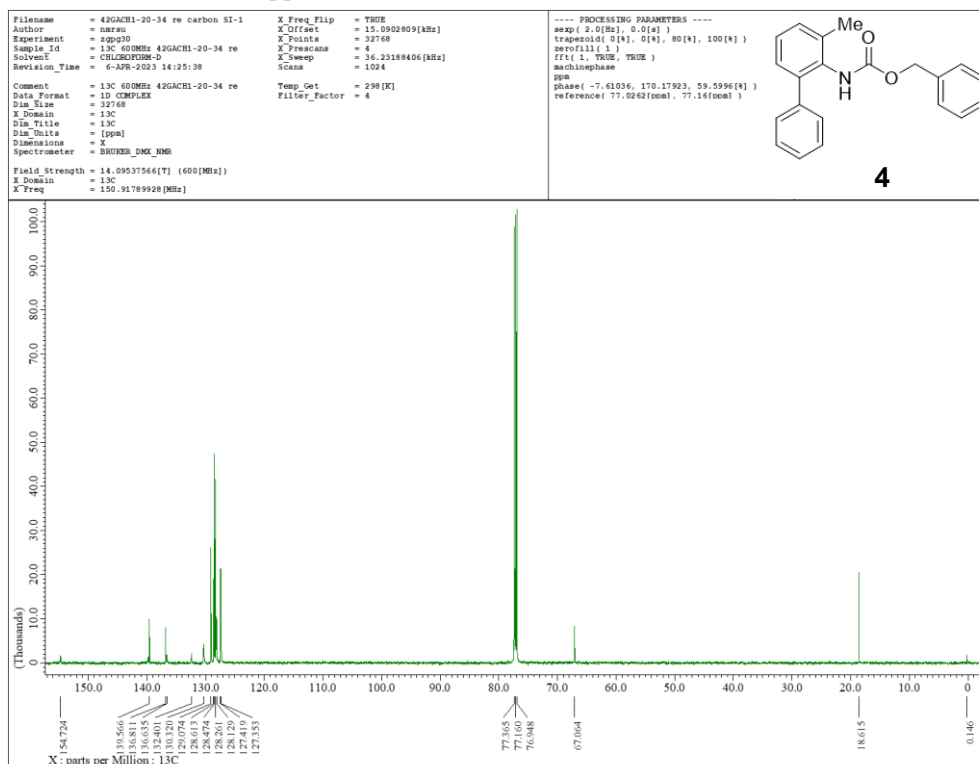

<sup>1</sup>H NMR (600 MHz, CDCl<sub>3</sub>, ppm) of **5**

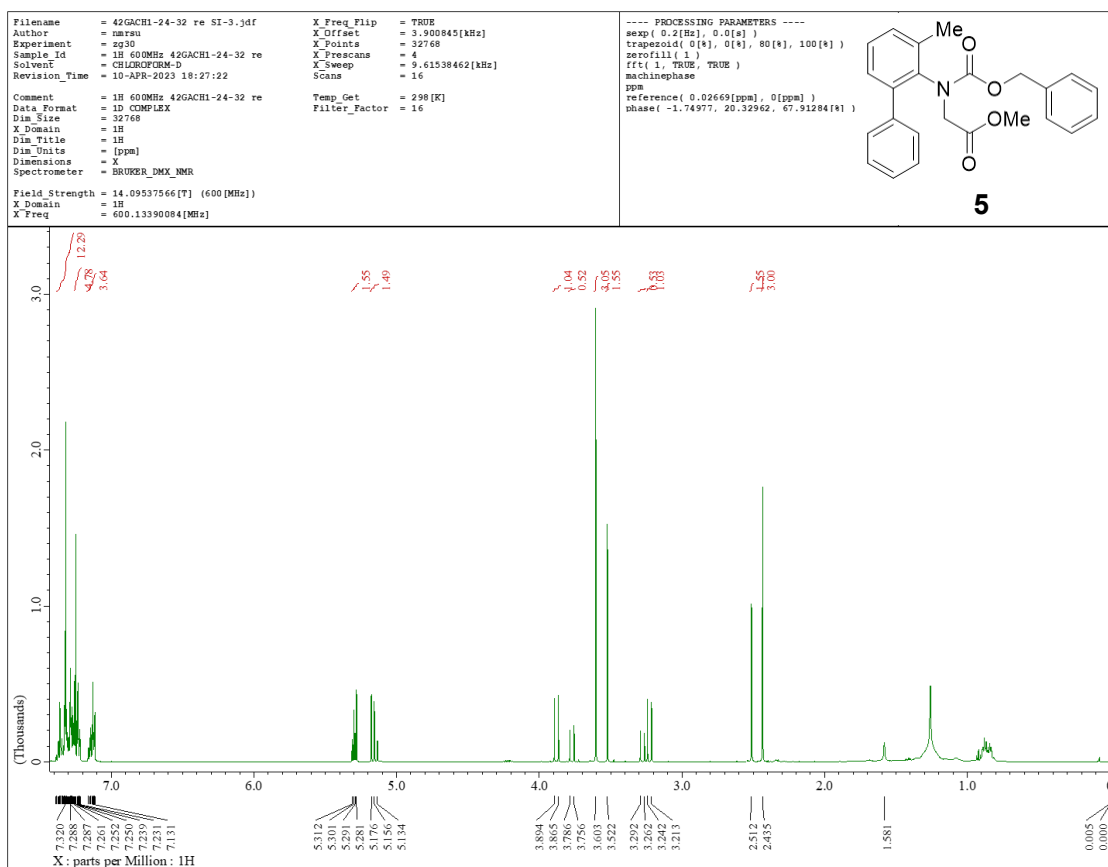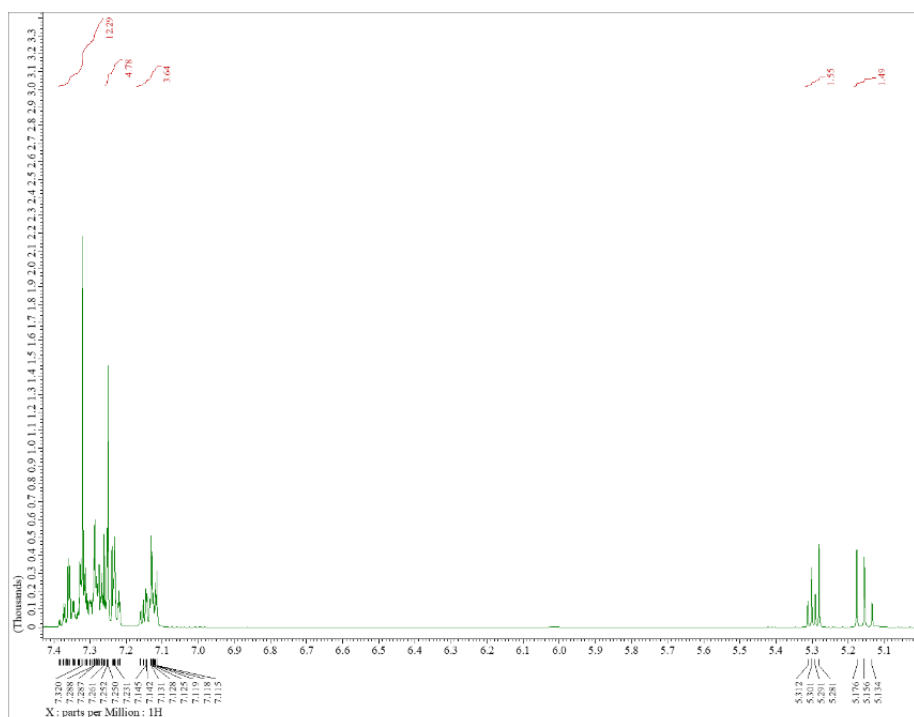

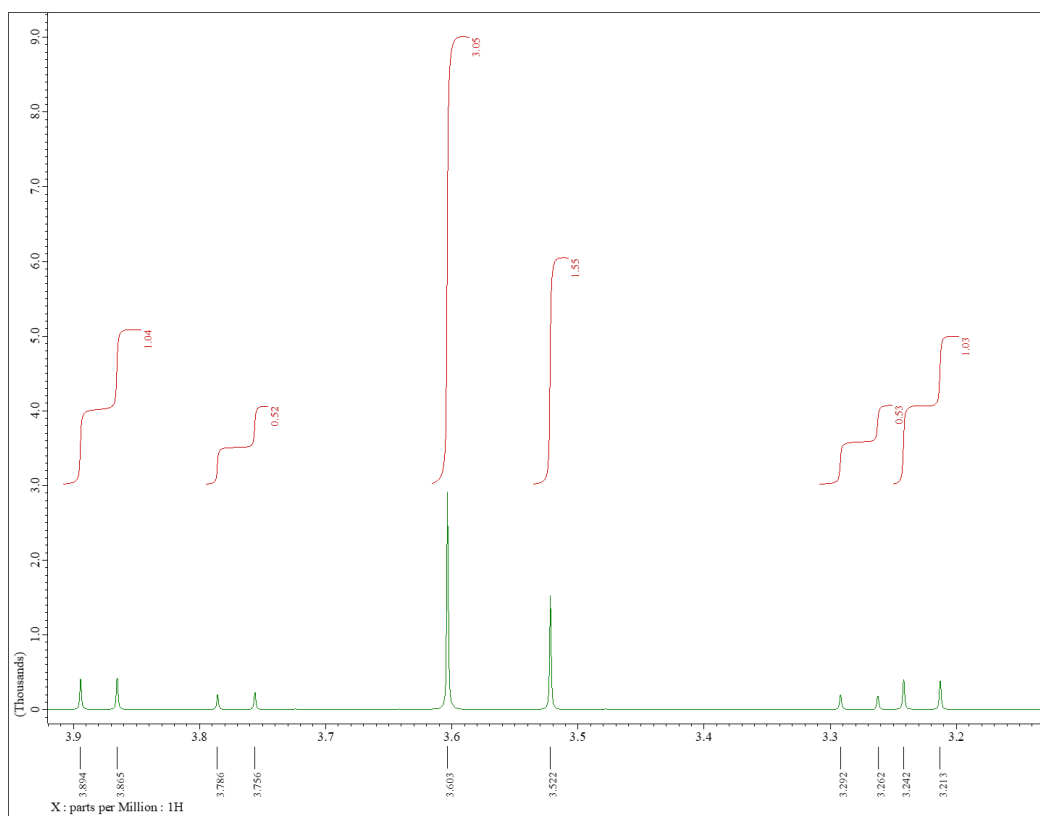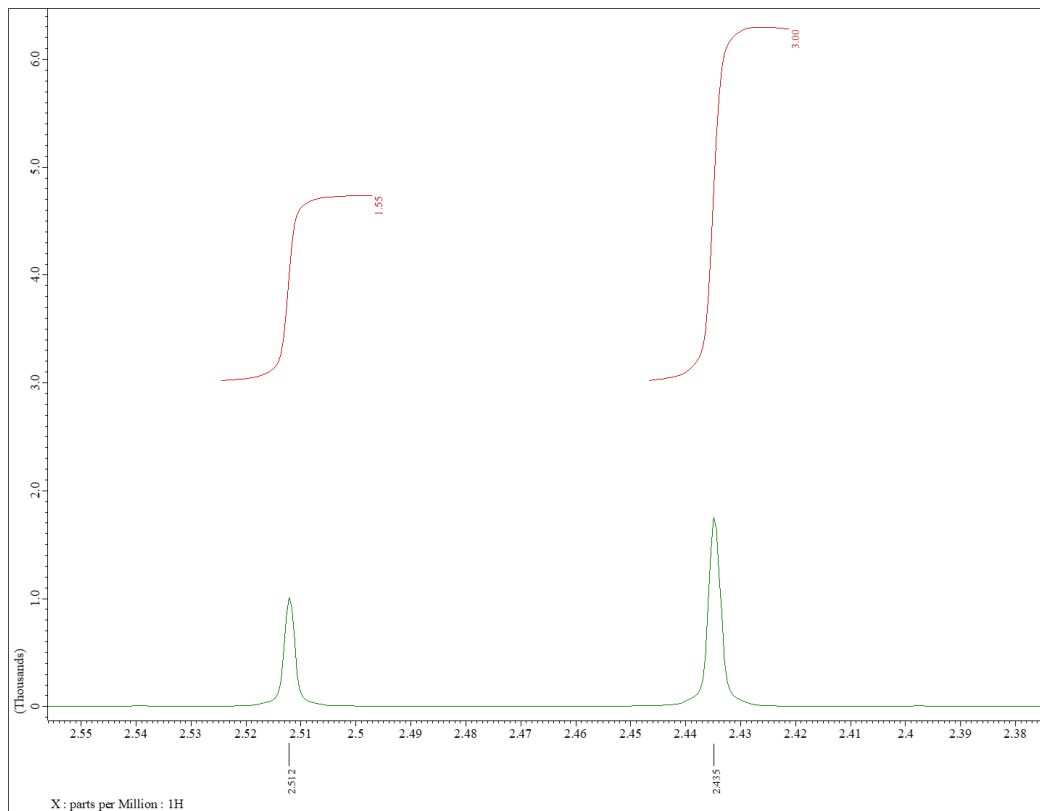

<sup>13</sup>C NMR (150 MHz, CDCl<sub>3</sub>, ppm) of **5**

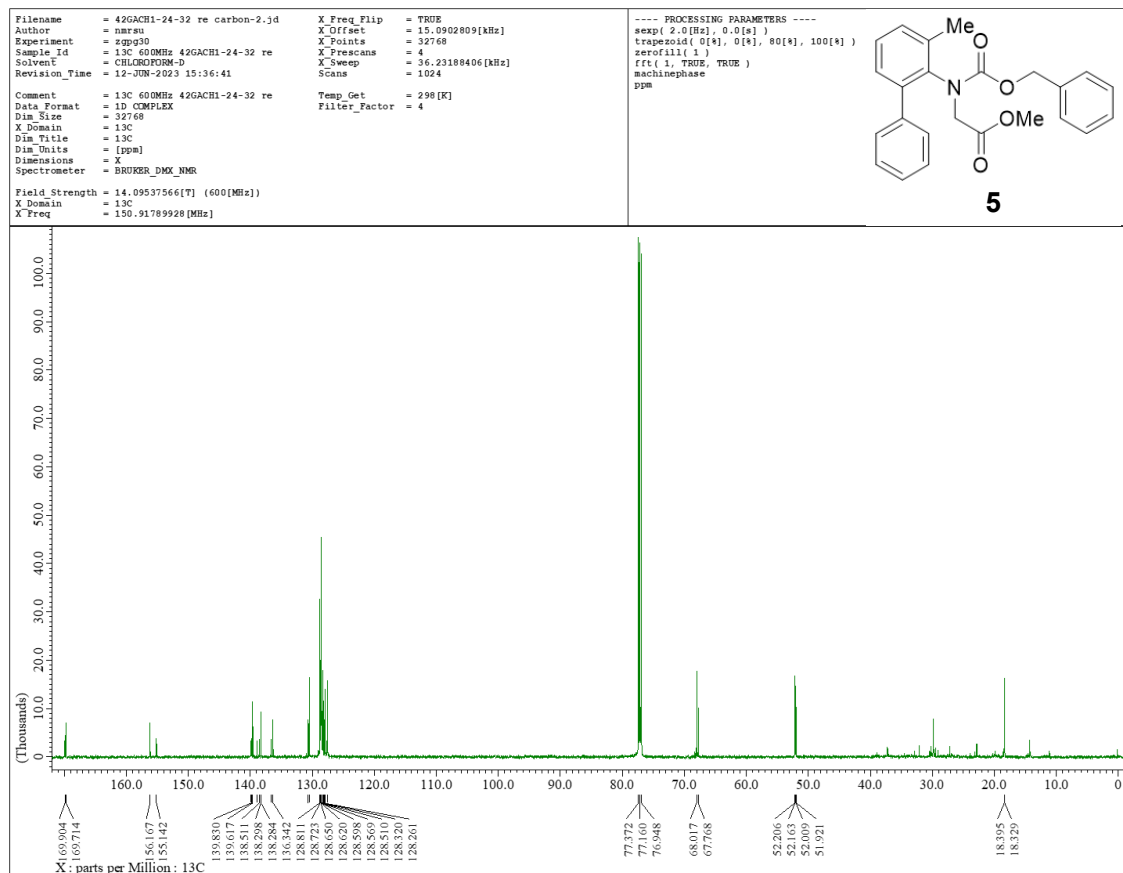

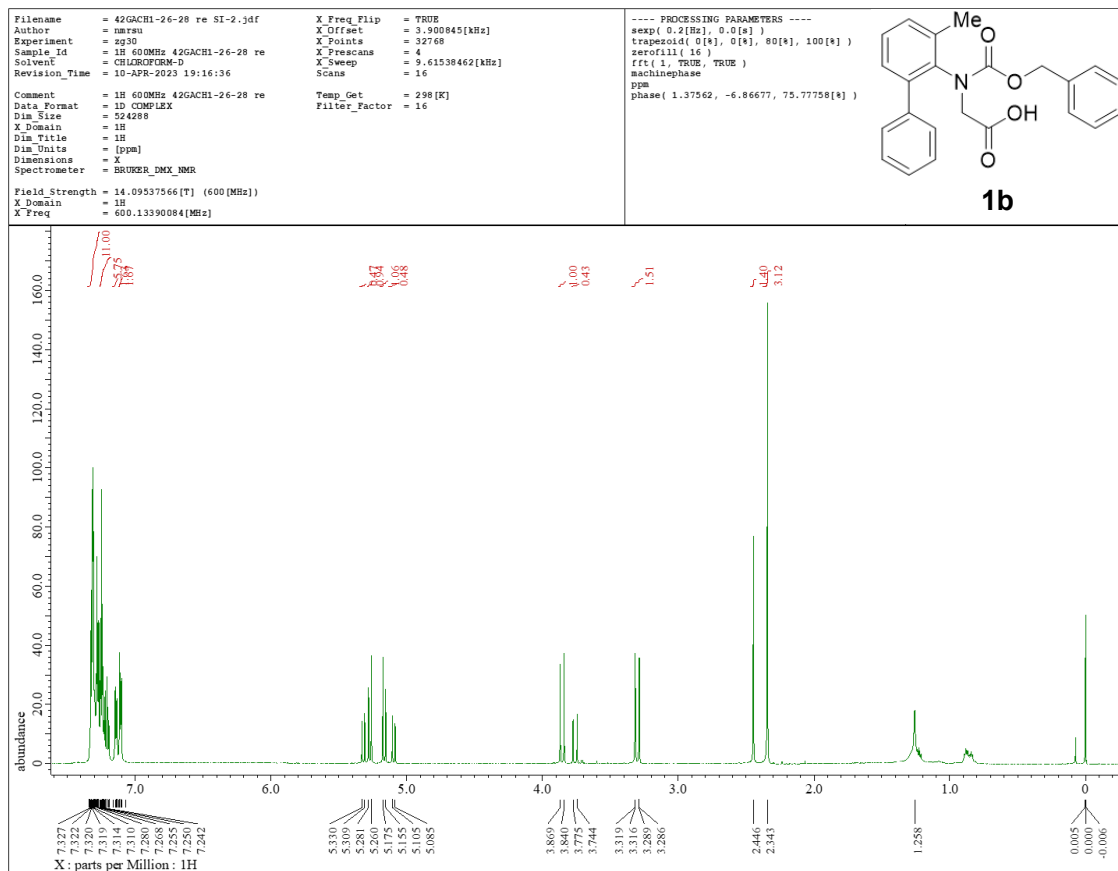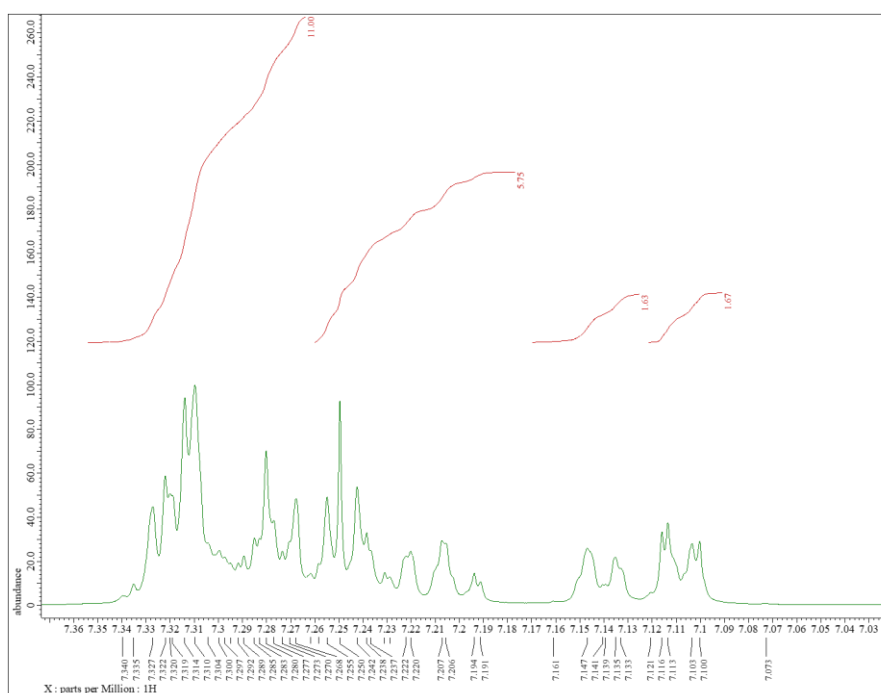

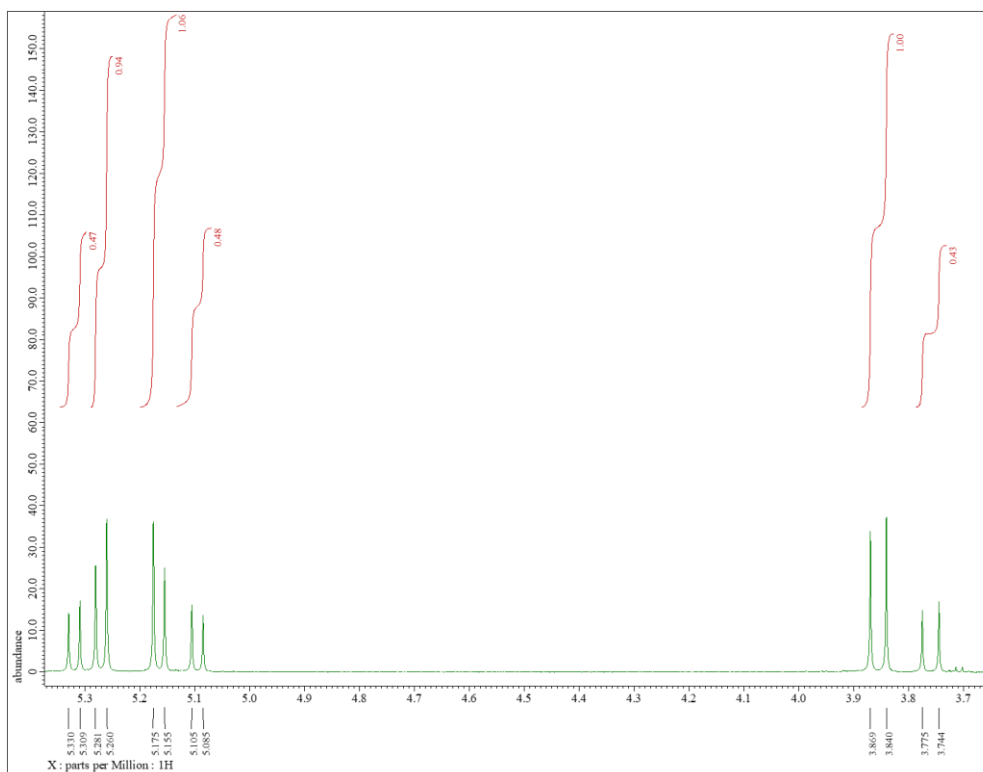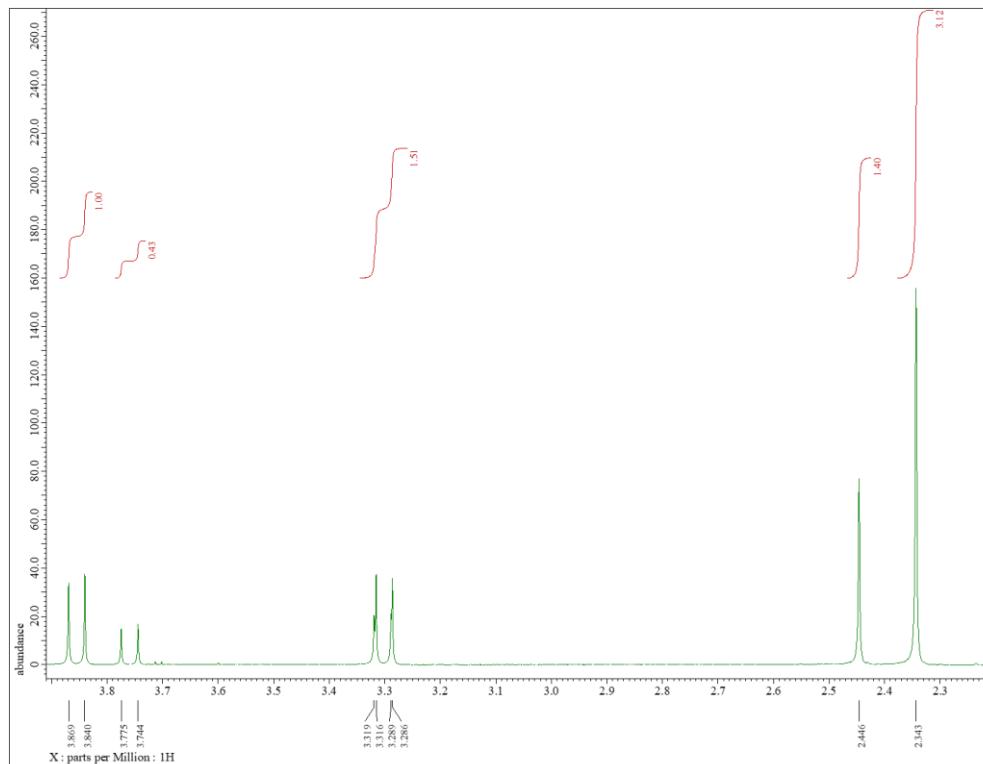

<sup>13</sup>C NMR (150 MHz, CDCl<sub>3</sub>, ppm) of **1b**

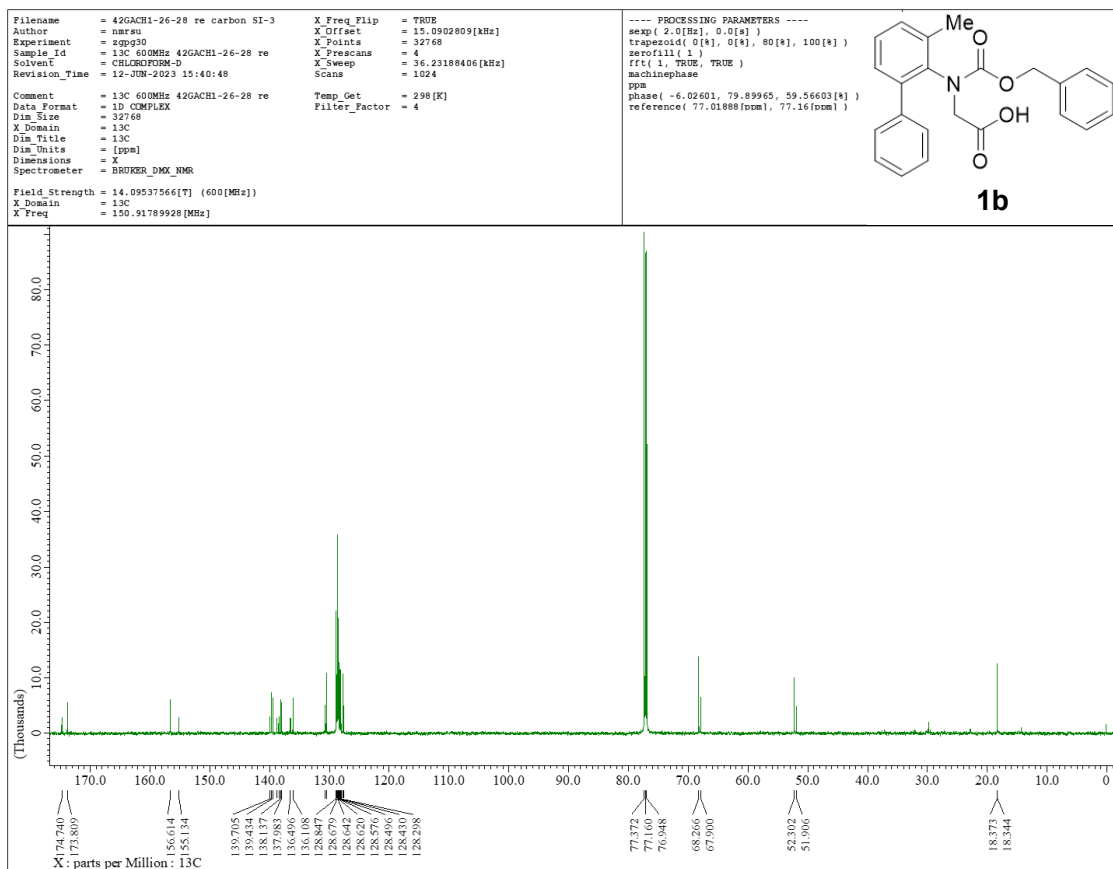



<sup>1</sup>H NMR (600 MHz, CDCl<sub>3</sub>, ppm) of **6**

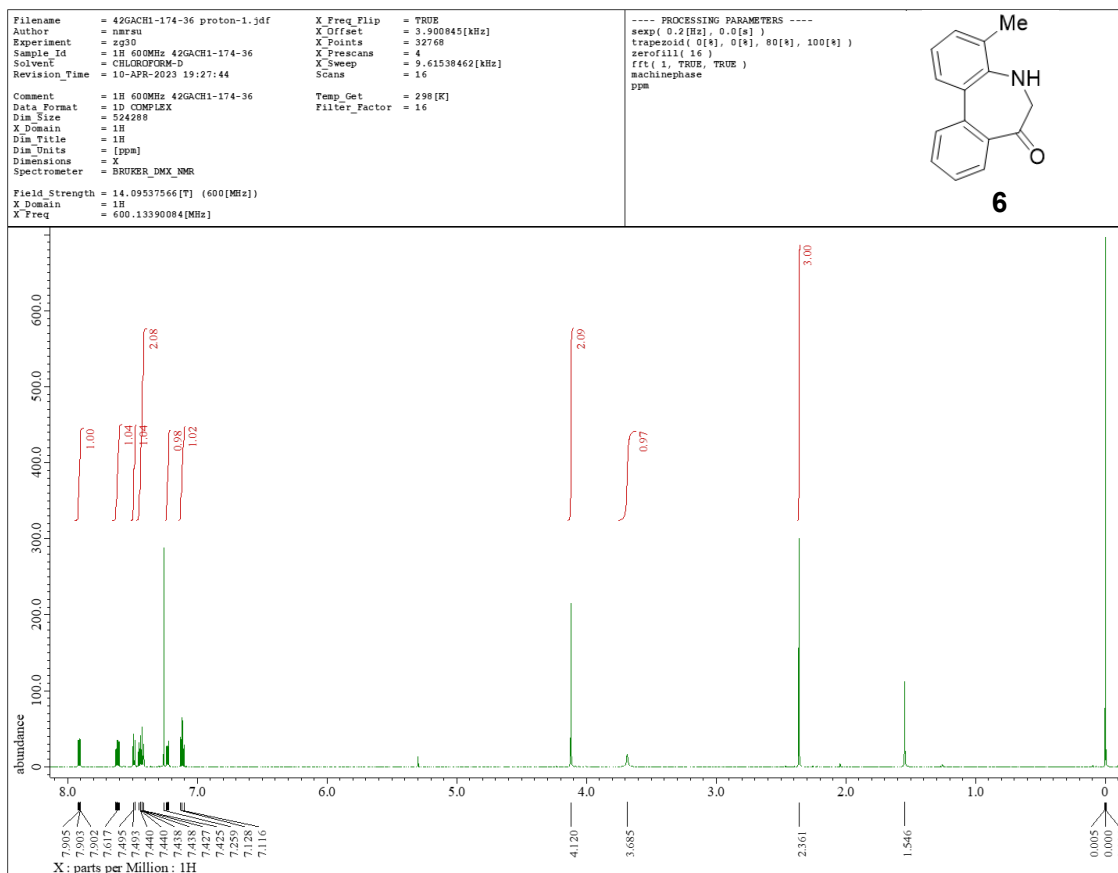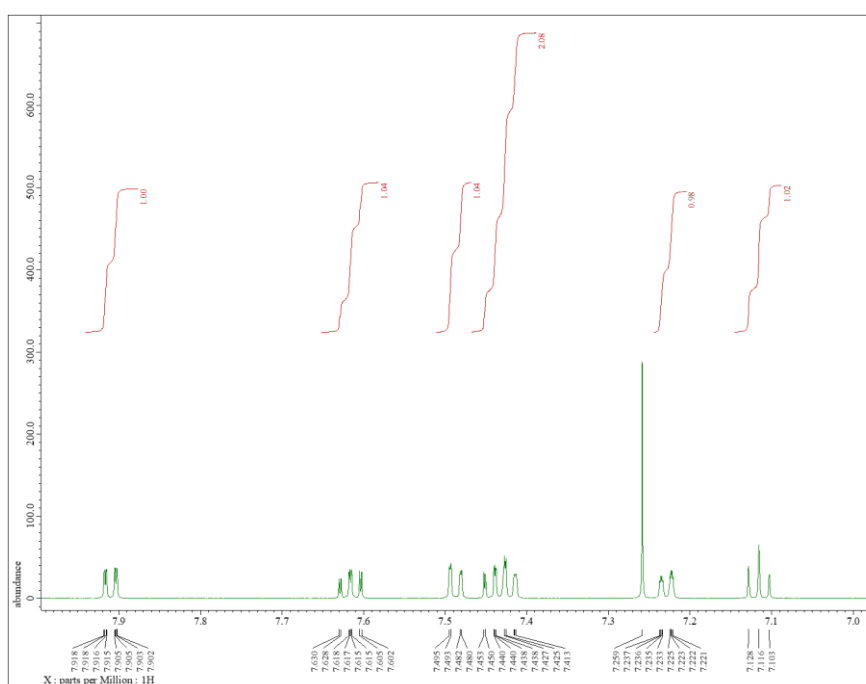

<sup>13</sup>C NMR (150 MHz, CDCl<sub>3</sub>, ppm) of **6**

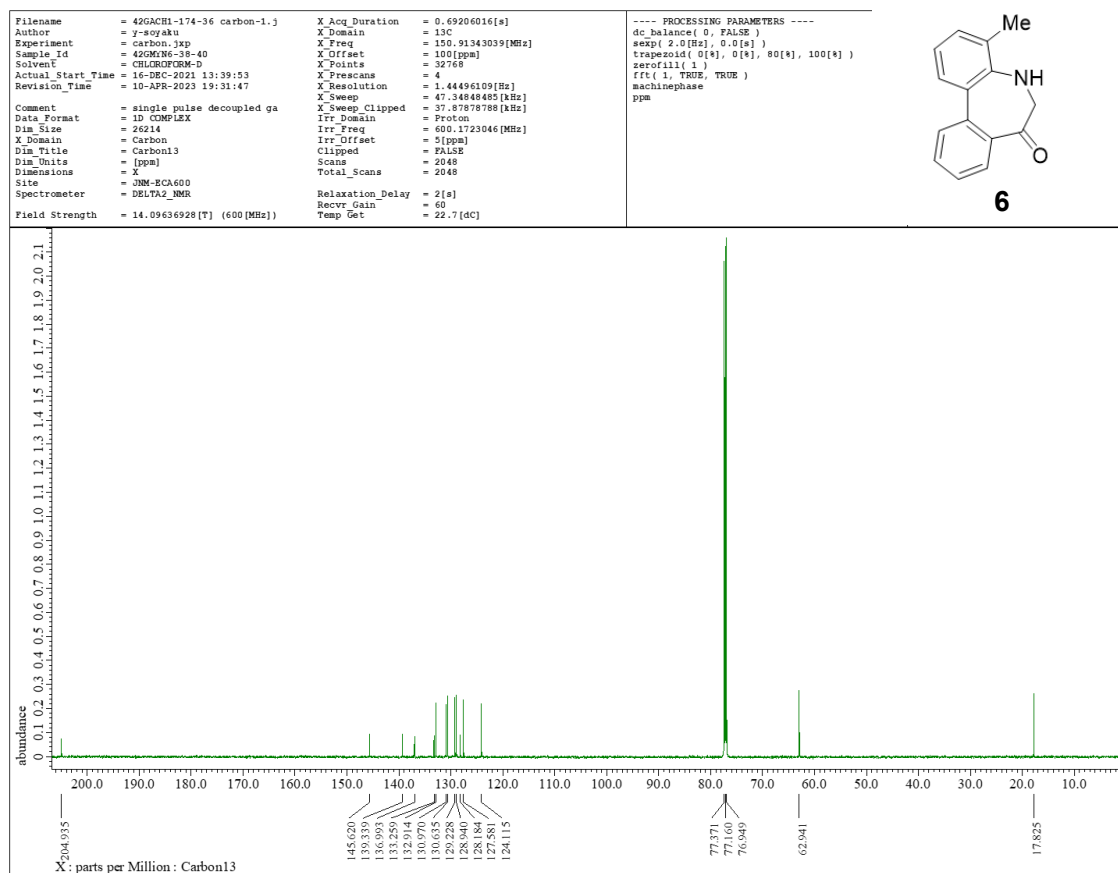

<sup>1</sup>H NMR (600 MHz, CDCl<sub>3</sub>, ppm) of **2a**

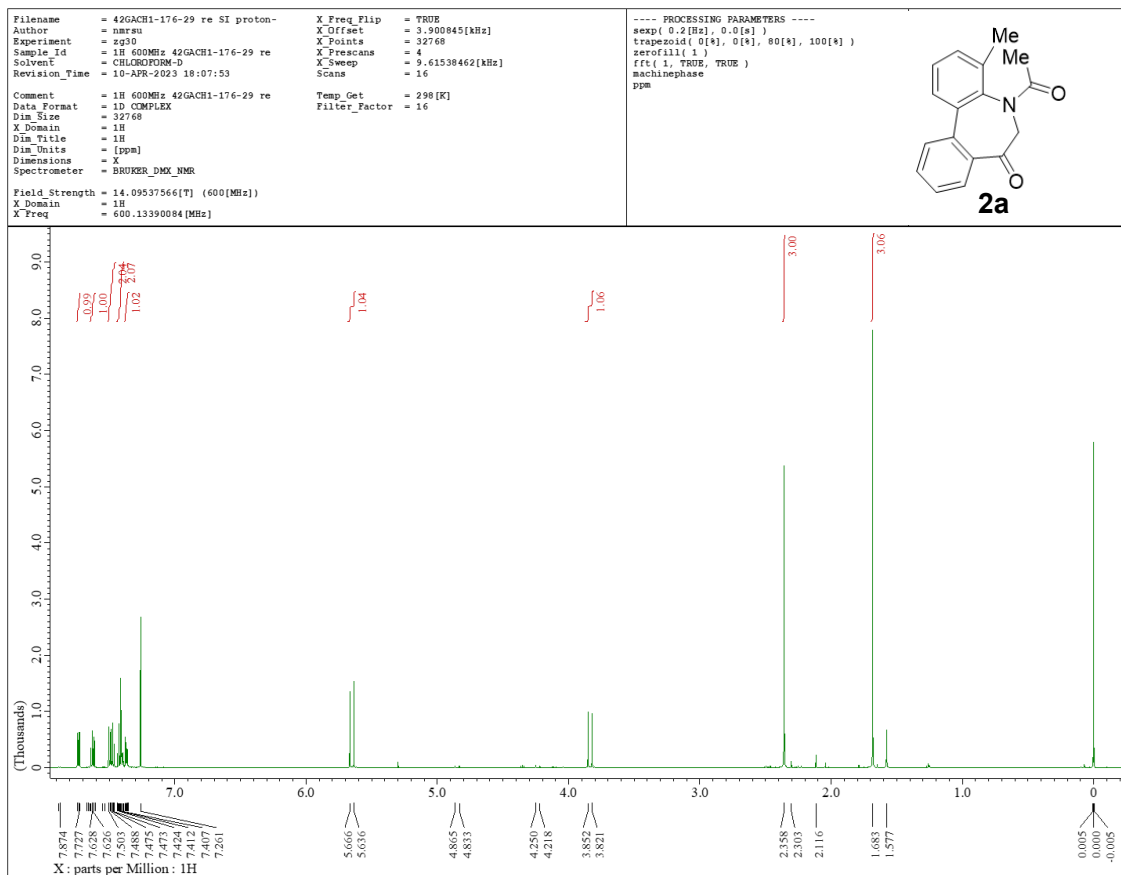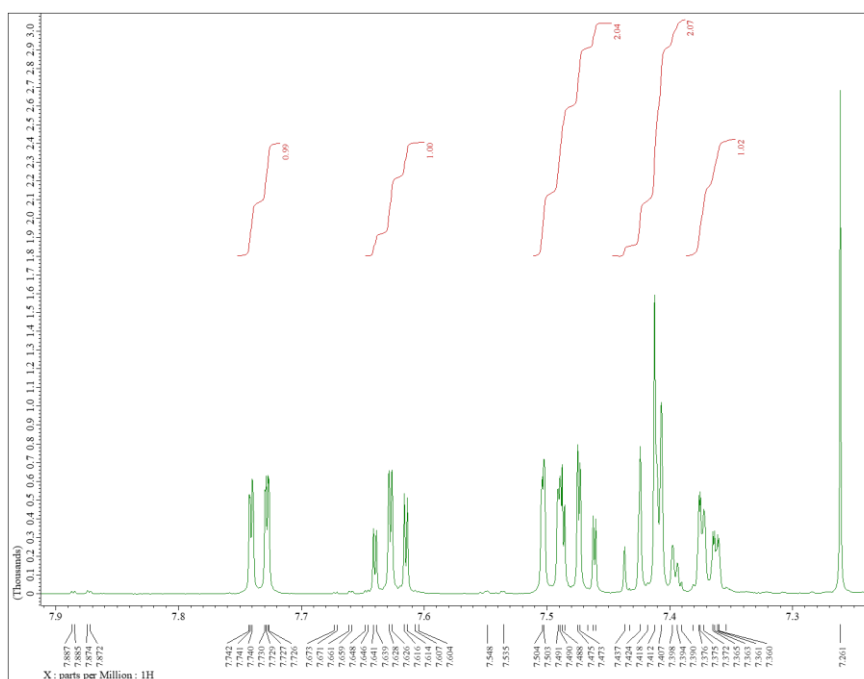

<sup>13</sup>C NMR (150 MHz, CDCl<sub>3</sub>, ppm) of **2a**

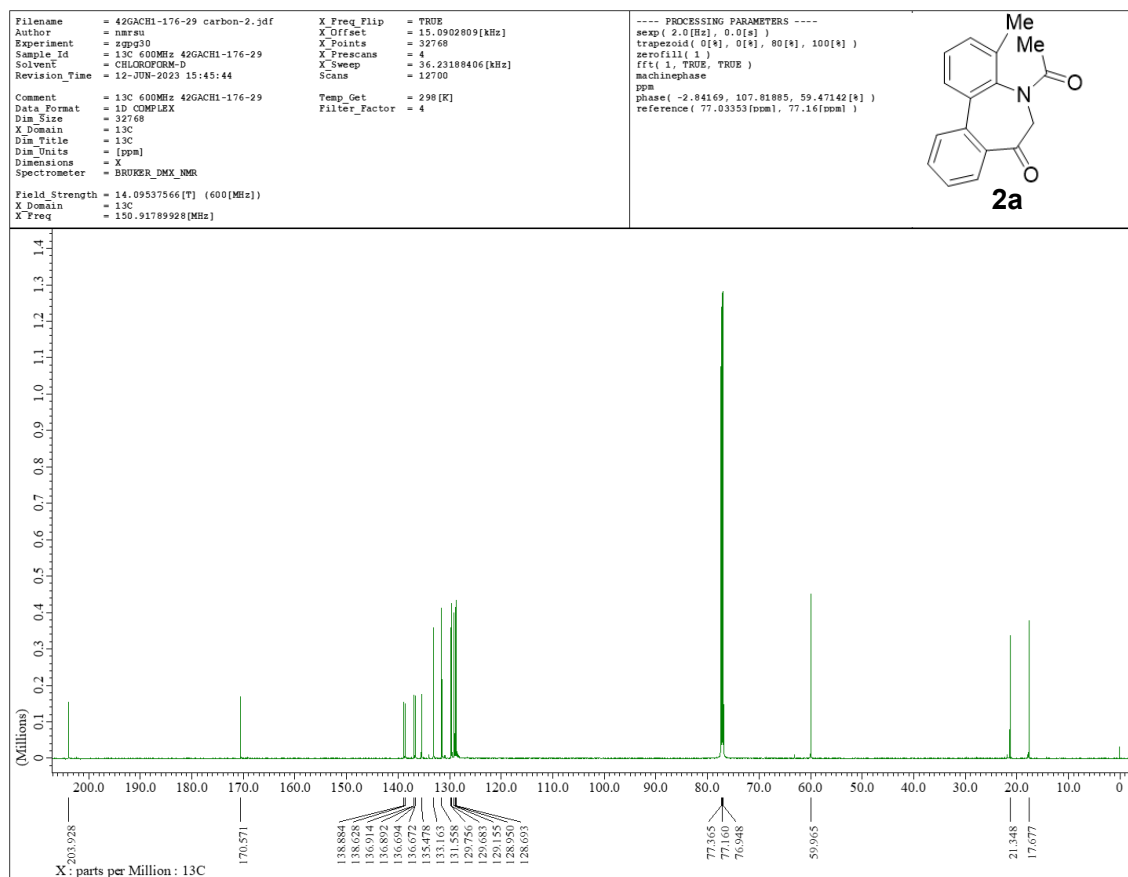

<sup>1</sup>H NMR (600 MHz, CDCl<sub>3</sub>, ppm) of **2b**

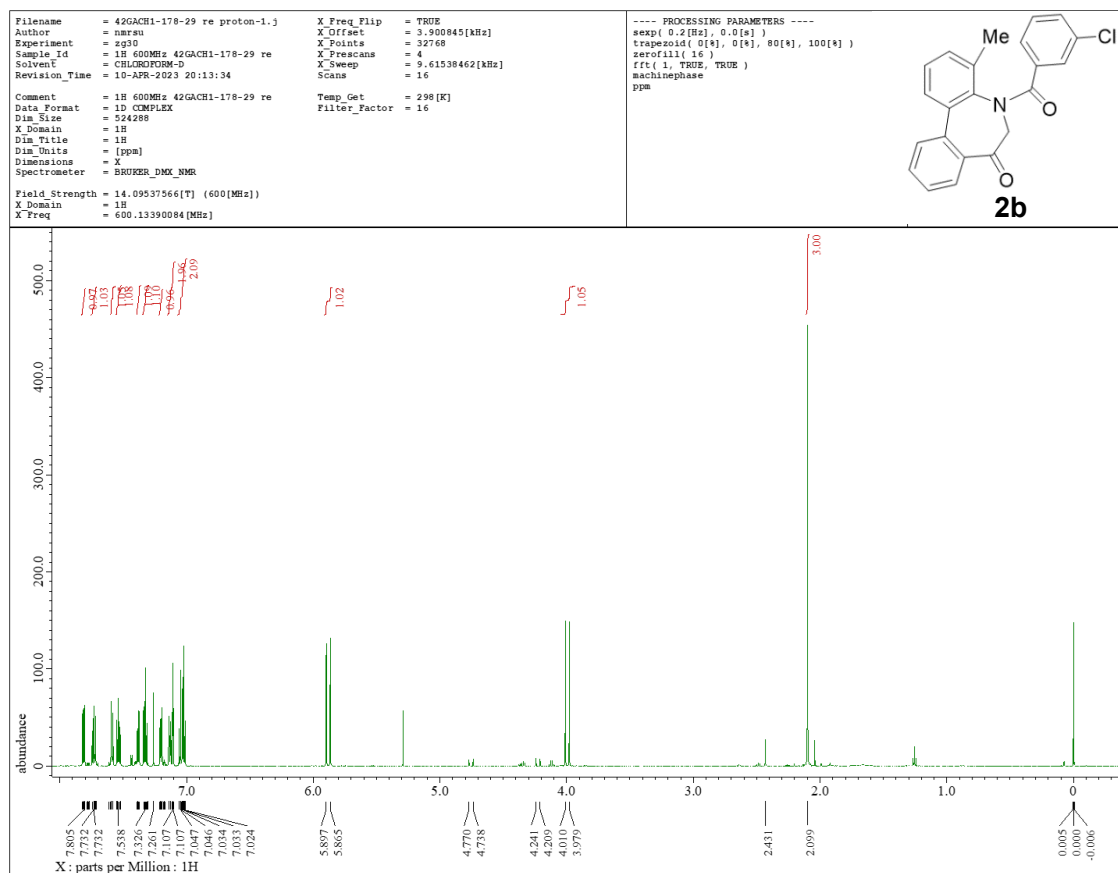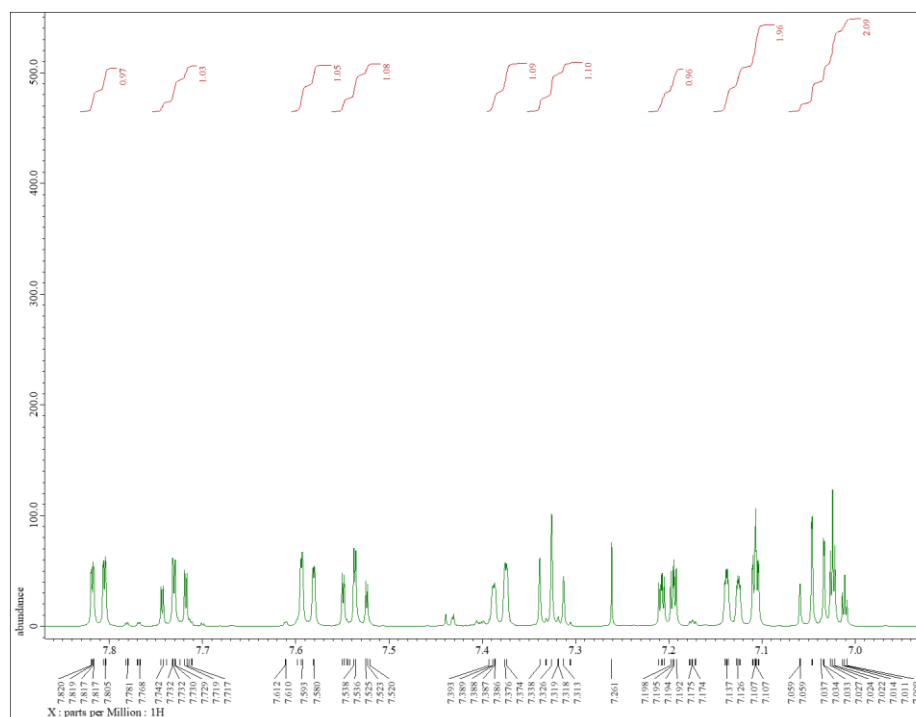

<sup>13</sup>C NMR (150 MHz, CDCl<sub>3</sub>, ppm) of **2b**

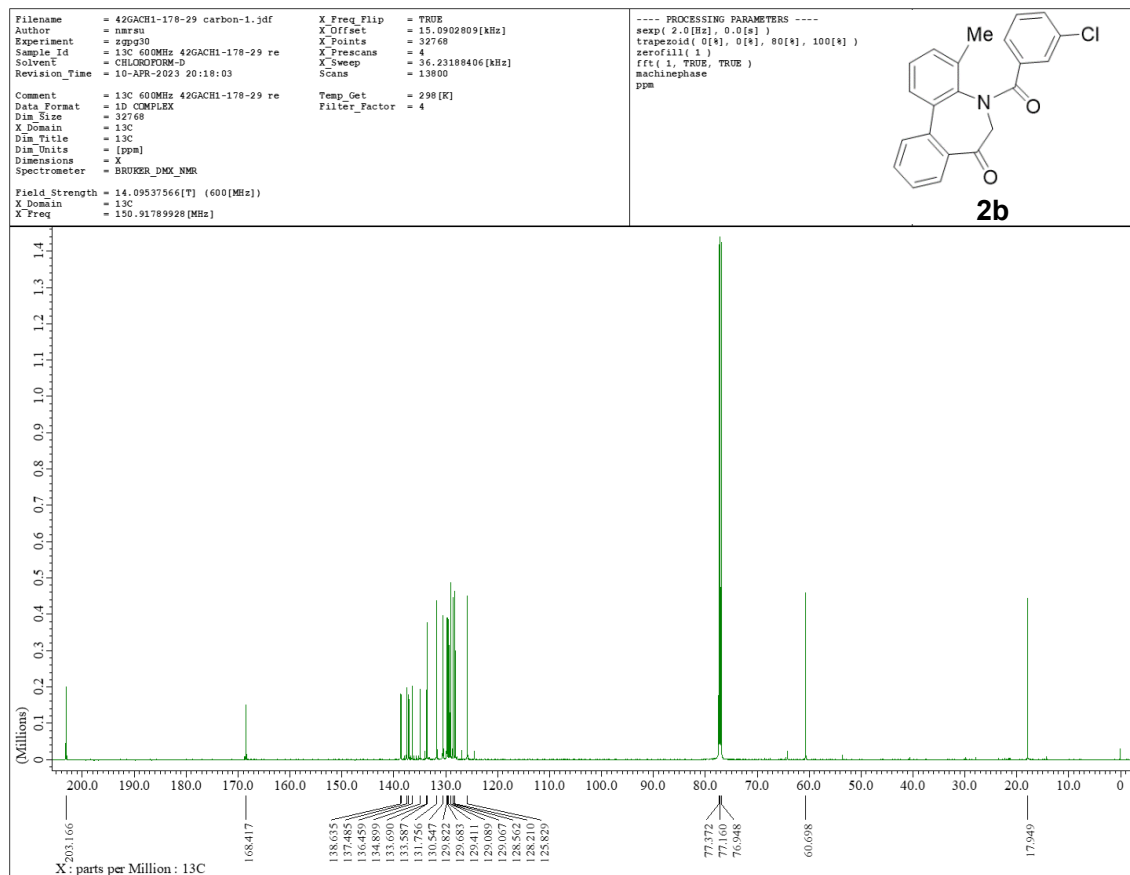

<sup>1</sup>H NMR (600 MHz, CDCl<sub>3</sub>, ppm) of **2c**

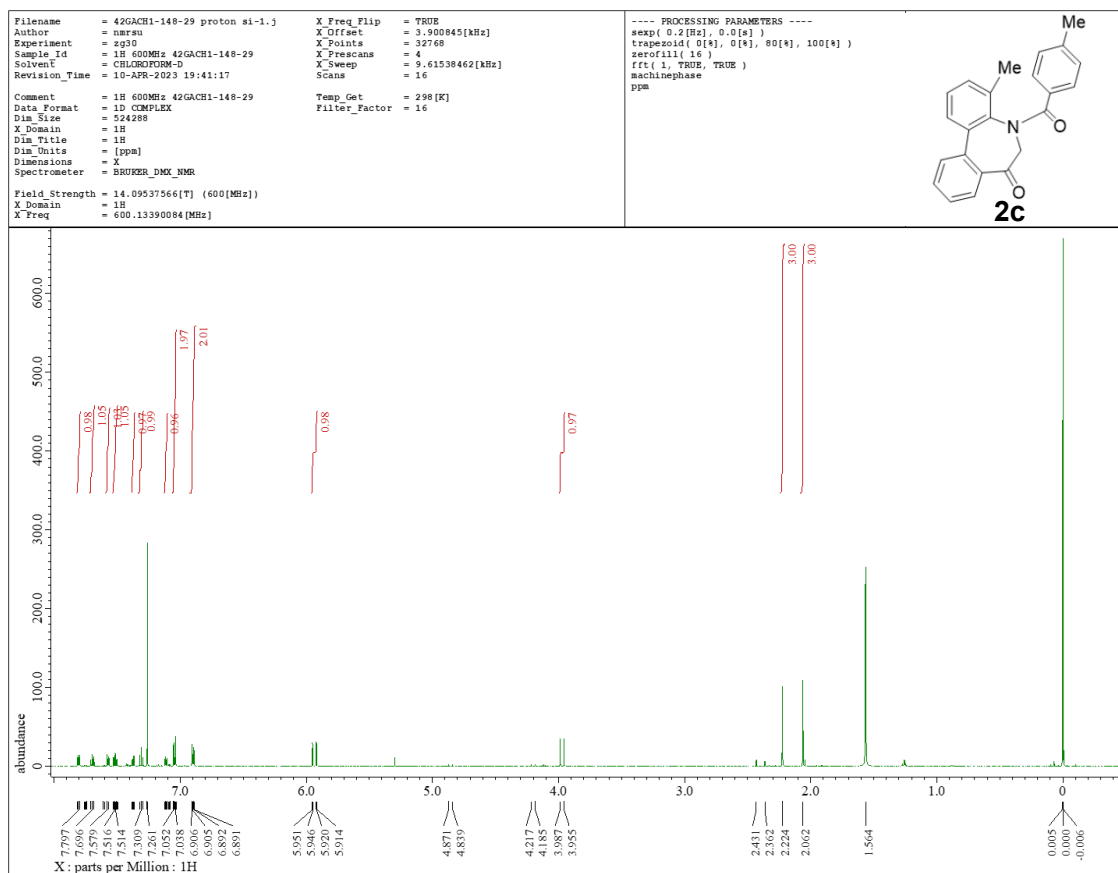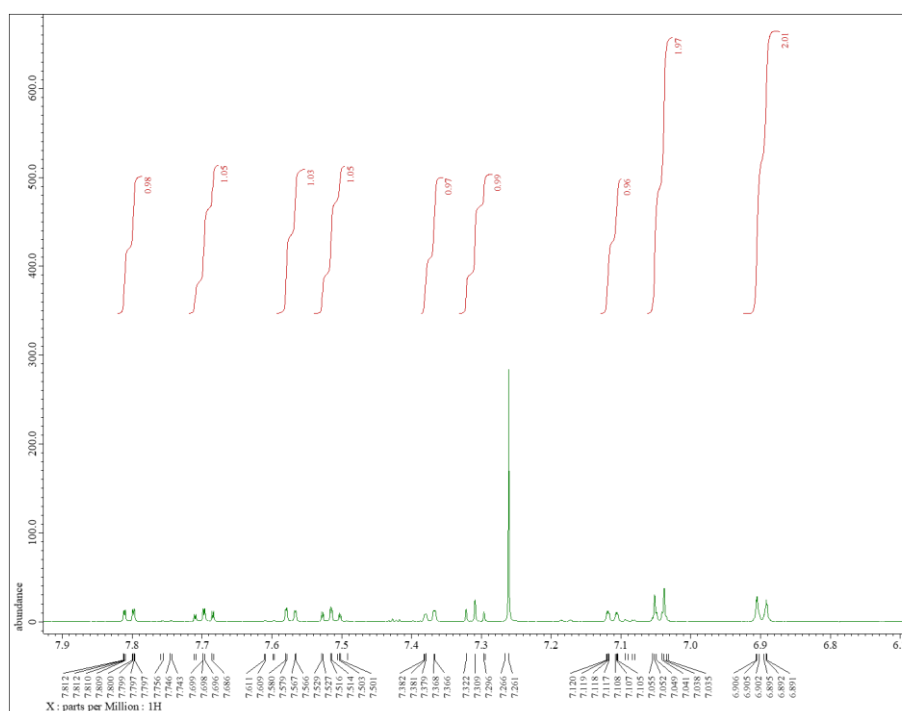

<sup>13</sup>C NMR (150 MHz, CDCl<sub>3</sub>, ppm) of **2c**

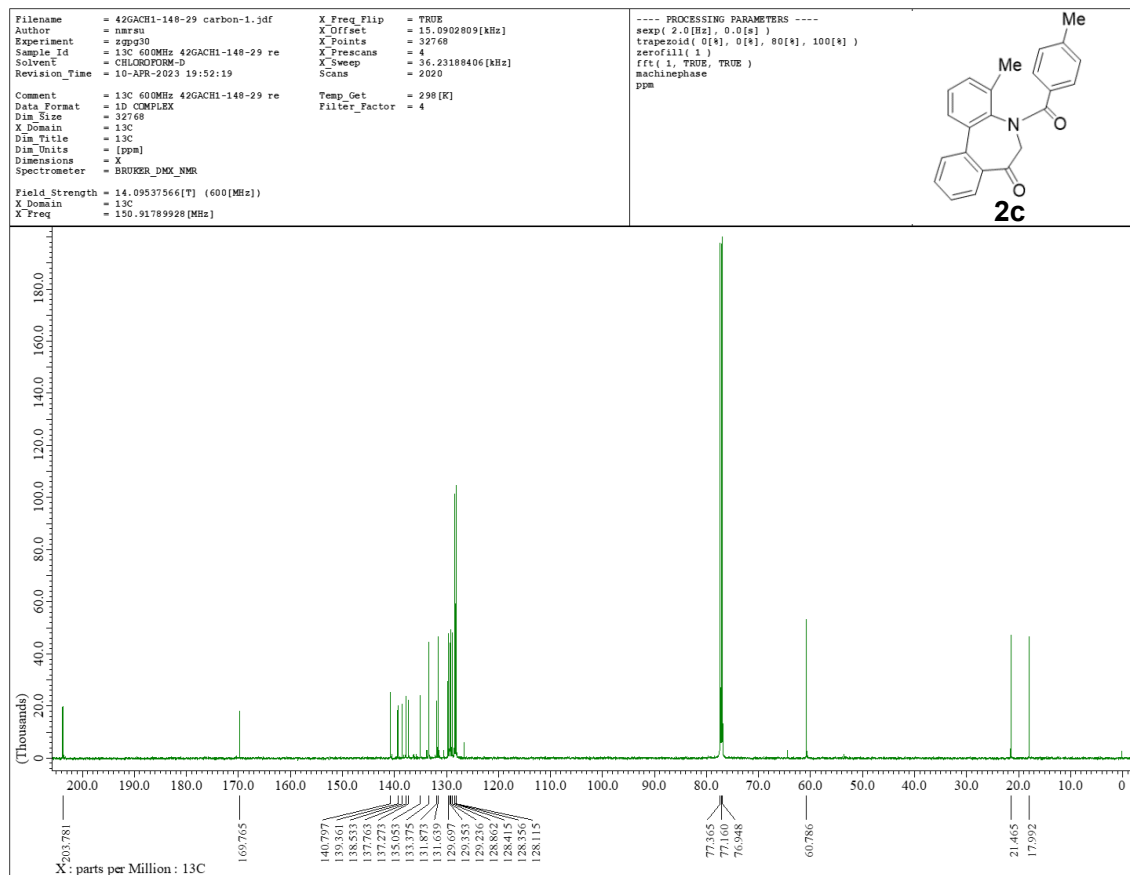

Supplement: s1 [file s1]
